# Supplementary material for: Application of Proteogenomics to Urine Analysis towards the Identification of Novel Biomarkers of Prostate Cancer: An Exploratory Study
Source: MDPI journal article supplement (doi:10.3390/cancers14082001), 2022-04-15
Supplement: s1 [file s1]

**Table S1.** Clinical data of subjects included in the discovery cohort group.

| Characteristic         | PCa, <i>n</i> = 5         | Controls, <i>n</i> = 5 |
|------------------------|---------------------------|------------------------|
| Age years              | 60 ± 2.5                  | 59 ± 5.4               |
| Serum PSA_ ng/mL       | 18 ± 14                   | -                      |
| Combined Gleason Score | 7 (4 + 3): 2 (40%)        | -                      |
|                        | 7 (3 + 4): 1 (20%)        |                        |
|                        | 6 (3 + 3): 2 (40%)        |                        |
| Clinical Stage         | cT2a: 2 (40%)             | -                      |
|                        | cT2b: 3 (60%)             |                        |
| Other pathologies      |                           |                        |
| Yes                    | AH+ Dyslipidemia: 1 (20%) | AH: 2 (40%)            |
|                        | AH+ Diabetes: 1 (20%)     |                        |
|                        | Hyperuricemia: 1 (20%)    |                        |
| No                     | 2 (40%)                   | 3 (60%)                |
| Smoking habits         |                           |                        |
| Yes                    | 1 (20%)                   | 3 (60%)                |
| No                     | 1 (20%)                   | 2 (40%)                |
| Unknown                | 3 (60%)                   | -                      |

Based on a shotgun discovery experiment, some candidate urinary targets for PCa prediction were identified in the discovery cohort (composed of five PCa patients (PCa 1-5d) and five non-cancer subjects (CNT 1-5d)). CT2a patients present a tumour in one half or less of only one side of the prostate, while, in CT2b stage, the tumour is localized in more than half of one side of the prostate. On the other hand, in CT3a and CT3b patients, the tumour extends beyond the prostate capsule or invades seminal vesicle(s), respectively. Abbreviations: AH: Arterial hypertension; CNT, cancer-free subjects; PCa, prostate cancer patients. .

**Table S2.** Clinical data of subjects included in the testing cohort group.

| Characteristic         | PCa, <i>n</i> = 30     | Controls, <i>n</i> = 30 |
|------------------------|------------------------|-------------------------|
| Age_years              | 62 ± 8.8               | 58 ± 3.3                |
| Serum PSA_ ng/mL       | 12 ± 11                | -                       |
| Combined Gleason Score |                        |                         |
| Known                  | 6 (3 + 3): 7 (23.33%)  | -                       |
|                        | 7 (3 + 4): 11 (36.67%) |                         |
|                        | 7 (4 + 3): 3 (10%)     |                         |
|                        | 8 (4 + 4): 4 (13.33%)  |                         |
|                        | 9 (4 + 5): 3 (10%)     |                         |
|                        | 9 (5 + 4): 1 (3.33%)   |                         |
| Unknown                | 1 (3.33%)              | -                       |
| Clinical Stage         |                        | -                       |
| Known                  | cT1N0M0: 2 (6.67%)     | -                       |
|                        | cT2N0M0: 13 (43.33%)   |                         |
|                        | cT2bN0M0: 2 (6.67%)    |                         |
|                        | cT3N1M0: 2 (6.67%)     |                         |
|                        | cT3aN0M0: 4 (13.33%)   |                         |
|                        | cT3bN0M0: 3 (10%)      |                         |
|                        | cT3bN1M0: 1 (3.33%)    |                         |
|                        | cT3bN + M0: 1 (3.33%)  |                         |
| Unknown                | 2 (6.67%)              | -                       |
| Other pathologies      |                        |                         |

| Characteristic | PCa, <i>n</i> = 30                                                                                                                                                                                                                                                                        | Controls, <i>n</i> = 30 |
|----------------|-------------------------------------------------------------------------------------------------------------------------------------------------------------------------------------------------------------------------------------------------------------------------------------------|-------------------------|
|                | Dyslipidemia: 4 (13.33%)<br>AH: 2 (6.67%)<br>T2D: 1 (3.33%)<br>AH+ Dyslipidemia: 3 (10%)<br>T2D+Dyslipidemia+AH: 1 (3.33%)<br>AH+ Hyperuricemia: 1 (3.33%)<br>AH+ Hyperuricemia+ Dyslipidemia: 1 (3.33%)<br>T2D + Dyslipidemia + Hyperuricemia: 1 (3.33%)<br>T2D; Dyslipidemia: 1 (3.33%) | -                       |
| Unknown        | 15 (50%)                                                                                                                                                                                                                                                                                  | 30 (100%)               |
| Smoking habits |                                                                                                                                                                                                                                                                                           |                         |
| Yes            | 10 (33.33%)                                                                                                                                                                                                                                                                               | 13 (43.33%)             |
| No             | 13 (43.33%)                                                                                                                                                                                                                                                                               | 17 (56.67%)             |
| Unknown        | 7 (23.33%)                                                                                                                                                                                                                                                                                | -                       |
| BMI            | 26 ± 2.3                                                                                                                                                                                                                                                                                  | -                       |

The suspected biomarkers were evaluated in an independent testing group, comprising thirty PCa patients (PCa 1-30) and thirty cancer-free subjects (CNT1-30). CT2a patients present a tumour in one half or less of only one side of the prostate, while, in CT2b stage, the tumour is localized in more than half of one side of the prostate. On the other hand, in CT3a and CT3b patients, the tumour extends beyond the prostate capsule or invades seminal vesicle(s), respectively. Concerning regional lymph nodes: Nx, defines a tumour that cannot be measured in nearby lymph nodes; N0, a tumour that has not spread to regional lymph nodes and N1, a tumour that has spread to regional lymph nodes. M1 and M0 nomenclature represent the tumours that have not spread to other parts of the body, respectively. Abbreviations: AH: Arterial hypertension; BMI: Body mass index; CNT, cancer-free subjects; PCa, prostate cancer patients; T2D: Type 2 diabetes. .

**Table S3.** Summary of statistical analysis results of shortlisted proteins evaluated in the testing group.

| Characteristic | N  | Overall, <i>n</i> = 60 <sup>1</sup> | PCa, <i>n</i> = 30 <sup>1</sup> | Controls, <i>n</i> = 30 <sup>1</sup> | <i>p</i> -value <sup>2</sup> |
|----------------|----|-------------------------------------|---------------------------------|--------------------------------------|------------------------------|
| Age_years      | 60 | 59 (56, 65)                         | 60 (57, 70)                     | 58(56, 60)                           | 0.04                         |
| Smoking_habits | 60 |                                     |                                 |                                      |                              |
| Unknown        |    | 7 (12%)                             | 7 (23.33%)                      | 0 (0%)                               |                              |
| No             |    | 30 (50%)                            | 13 (43.33%)                     | 17 (57%)                             |                              |
| Yes            |    | 23 (38%)                            | 10 (33.33%)                     | 13 (43%)                             |                              |
| AMBP           | 60 | 0.95 (0.79, 1.13)                   | 0.99 (0.81, 1.14)               | 0.94 (0.80, 1.12)                    | 0.65                         |
| CDH1           | 60 | 0.93 (0.59, 1.60)                   | 0.42 (0.31, 0.56)               | 0.43 (0.36, 0.57)                    | 0.75                         |
| EFEMP1         | 60 | 0.43 (0.33, 0.56)                   | 0.42 (0.31, 0.56)               | 0.43 (0.36, 0.57)                    | 0.46                         |
| LMAN2          | 60 | 0.75 (0.65, 0.96)                   | 0.76 (0.71, 1.02)               | 0.70 (0.62, 0.87)                    | 0.17                         |
| TTR            | 60 | 0.47 (0.28, 0.84)                   | 0.49 (0.28, 0.80)               | 0.40 (0.30, 0.88)                    | 0.84                         |

1. Median (IQ1, IQ3). 2. Wilcoxon rank sum test; t-test with Welch's correction; Student's t-Test.

**Table S5.** Prediction of likely impact of point mutations on protein function using PolyPhen-2 tool.

| Protein name                      | Gene name | Mutation | Prediction        | Score | Sensitivity | Specificity |
|-----------------------------------|-----------|----------|-------------------|-------|-------------|-------------|
| Nidogen-1                         | NID1      | P99T     | Possibly damaging | 0.722 | 0.86        | 0.92        |
| Nidogen-1                         | NID1      | V246I    | Benign            | 0     | 1           | 0           |
| Lactotransferrin                  | LTF       | A29T     | Benign            | 0.001 | 0.99        | 0.15        |
| Lactotransferrin                  | LTF       | E579D    | Benign            | 0.001 | 0.99        | 0.15        |
| Lactotransferrin                  | LTF       | P444T    | Benign            | 0.01  | 0.96        | 0.77        |
| Centrosome-associated protein 350 | CEP350    | L2405F   | Probably damaging | 0.989 | 0.72        | 0.97        |

|                                                       |          |       |                   |       |      |      |
|-------------------------------------------------------|----------|-------|-------------------|-------|------|------|
| CLIP-associating protein 2                            | CLASP2   | I201V | Probably damaging | 0.989 | 0.72 | 0.97 |
| Multivesicular body subunit 12B                       | MVB12B   | T205M | Probably damaging | 0.995 | 0.68 | 0.97 |
| Prothrombin                                           | F2       | E110K | Benign            | 0.001 | 0.99 | 0.15 |
| Zinc finger CCH-type antiviral protein 1              | ZC3HAV1  | P209L | Benign            | 0.022 | 0.95 | 0.8  |
| Tetranectin                                           | CLEC3B   | G106S | Benign            | 0.099 | 0.93 | 0.85 |
| Alpha-2-HS-glycoprotein                               | AHSG     | G75A  | Possibly damaging | 0.945 | 0.8  | 0.95 |
| Aminopeptidase N                                      | ANPEP    | D370N | Possibly damaging | 0.74  | 0.85 | 0.92 |
| Aminopeptidase N                                      | ANPEP    | R86Q  | Benign            | 0.001 | 0.99 | 0.15 |
| Aminopeptidase N                                      | ANPEP    | P465L | Probably damaging | 0.996 | 0.55 | 0.98 |
| Aminopeptidase N                                      | ANPEP    | G141D | Possibly damaging | 0.851 | 0.83 | 0.93 |
| Deoxyribonuclease-1                                   | DNASE1   | G262D | Possibly damaging | 0.489 | 0.89 | 0.9  |
| tRNA pseudouridine(38/39) synthase                    | PUS3     | Q126H | Probably damaging | 1     | 0    | 1    |
| Collagen alpha-1(VI) chain                            | COL6A1   | G700V | Probably damaging | 0.999 | 0.14 | 0.99 |
| Alpha-1-antichymotrypsin                              | SERPINA3 | E164Q | Probably damaging | 0.996 | 0.55 | 0.98 |
| Complement C3                                         | C3       | P314L | Benign            | 0.227 | 0.91 | 0.88 |
| Complement C1r subcomponent-like protein              | C1RL     | I285V | Benign            | 0.45  | 0.89 | 0.9  |
| Probable protein phosphatase 1N                       | PPM1N    | T217A | Benign            | 0.27  | 0.91 | 0.88 |
| Fibrinogen alpha chain                                | FGA      | D633E | Benign            | 0.127 | 0.93 | 0.86 |
| Iron-sulfur cluster assembly 2 homolog, mitochondrial | ISCA2    | V121L | Possibly damaging | 0.649 | 0.87 | 0.91 |
| Sorting nexin-2                                       | SNX2     | Q312K | Possibly damaging | 0.578 | 0.88 | 0.91 |
| Ephrin type-A receptor 7                              | EPHA7    | E240K | Possibly damaging | 0.545 | 0.88 | 0.91 |
| Hemopexin                                             | HPX      | Y198C | Probably damaging | 1     | 0    | 1    |
| Hemopexin                                             | HPX      | P140R | Probably damaging | 1     | 0    | 1    |
| Acid-sensing ion channel 3                            | ASIC3    | S156F | Possibly damaging | 0.831 | 0.84 | 0.93 |
| Plasma serine protease inhibitor                      | SERPINA5 | S68F  | Probably damaging | 1     | 0    | 1    |
| Plasma serine protease inhibitor                      | SERPINA5 | A60D  | Benign            | 0.002 | 0.99 | 0.3  |
| Plasma serine protease inhibitor                      | SERPINA5 | K105E | Benign            | 0     | 1    | 0    |

|                                                  |          |        |                      |       |      |      |
|--------------------------------------------------|----------|--------|----------------------|-------|------|------|
| Alpha-1-acid glycoprotein<br>2                   | ORM2     | S143Y  | Probably<br>damaging | 0.984 | 0.74 | 0.96 |
| Endosialin                                       | CD248    | S72N   | Benign               | 0     | 1    | 0    |
| Endosialin                                       | CD248    | A303V  | Probably<br>damaging | 0.957 | 0.78 | 0.95 |
| Lysosomal alpha-<br>glucosidase                  | GAA      | R223H  | Benign               | 0.206 | 0.92 | 0.88 |
| Lysosomal alpha-<br>glucosidase                  | GAA      | E689K  | Benign               | 0.028 | 0.95 | 0.81 |
| Lysosomal alpha-<br>glucosidase                  | GAA      | V780I  | Benign               | 0.001 | 0.99 | 0.15 |
| Lysosomal alpha-<br>glucosidase                  | GAA      | V84I   | Benign               | 0.001 | 0.99 | 0.15 |
| Keratin, type I cytoskeletal<br>17               | KRT17    | G231A  | Benign               | 0.389 | 0.9  | 0.89 |
| Keratin, type I cytoskeletal<br>17               | KRT17    | I208T  | Possibly<br>damaging | 0.956 | 0.79 | 0.95 |
| Prolactin-inducible protein                      | PIP      | Q79H   | Benign               | 0.001 | 0.99 | 0.15 |
| NKAP-like protein                                | NKAPL    | R6L    | Possibly<br>damaging | 0.649 | 0.87 | 0.91 |
| Ganglioside GM2 activator                        | GM2A     | V153A  | Benign               | 0.019 | 0.95 | 0.8  |
| Catechol O-<br>methyltransferase                 | COMT     | A146V  | Probably<br>damaging | 0.968 | 0.77 | 0.95 |
| Glioma pathogenesis-<br>related protein 1        | GLIPR1   | P223A  | Possibly<br>damaging | 0.915 | 0.81 | 0.94 |
| Zymogen granule protein<br>16 homolog B          | ZG16B    | D71N   | Possibly<br>damaging | 0.899 | 0.82 | 0.94 |
| Alpha-1-antitrypsin                              | SERPINA1 | E400D  | Benign               | 0.002 | 0.99 | 0.3  |
| Elongator complex protein<br>4                   | ELP4     | A405V  | Possibly<br>damaging | 0.565 | 0.88 | 0.91 |
| Polymeric immunoglobulin<br>receptor             | PIGR     | G336D  | Benign               | 0.092 | 0.93 | 0.85 |
| Polymeric immunoglobulin<br>receptor             | PIGR     | G365S  | Probably<br>damaging | 1     | 0    | 1    |
| Insulin-like growth factor-<br>binding protein 7 | IGFBP7   | G244E  | Probably<br>damaging | 1     | 0    | 1    |
| Kininogen-1                                      | KNG1     | P154L  | Probably<br>damaging | 0.998 | 0.21 | 0.99 |
| Epididymis-specific alpha-<br>mannosidase        | MAN2B2   | G624R  | Probably<br>damaging | 0.998 | 0.27 | 0.99 |
| Haptoglobin-related<br>protein                   | HPR      | V325M  | Probably<br>damaging | 0.987 | 0.73 | 0.96 |
| Colagem alpha-3(IV) chain                        | COL4A3   | P1255T | Benign               | 0.267 | 0.91 | 0.88 |
| Actin, cytoplasmic 2                             | ACTG1    | G168A  | Probably<br>damaging | 0.998 | 0.27 | 0.99 |
| Actin, cytoplasmic 2                             | ACTG1    | G156V  | Probably<br>damaging | 1     | 0    | 1    |
| Gamma-glutamyl<br>hydrolase                      | GGH      | L183R  | Benign               | 0.001 | 0.99 | 0.15 |
| Leucine-rich alpha-2-<br>glycoprotein            | LRG1     | P133S  | Benign               | 0.267 | 0.91 | 0.88 |

|                                           |         |        |                   |       |      |      |
|-------------------------------------------|---------|--------|-------------------|-------|------|------|
| Beta-hexosaminidase subunit alpha         | HEXA    | I436V  | Benign            | 0     | 1    | 0    |
| Retinol-binding protein 4                 | RBP4    | G93D   | Probably damaging | 1     | 0    | 1    |
| Fibronectin                               | FN1     | V226I  | Benign            | 0.002 | 0.99 | 0.3  |
| Glutaminyl-peptide cyclotransferase       | QPCT    | L320R  | Probably damaging | 0.998 | 0.27 | 0.99 |
| BDNF/NT-3 growth factors receptor         | NTRK2   | K328R  | Possibly damaging | 0.605 | 0.87 | 0.91 |
| Vitamin D-binding protein                 | GC      | D432E  | Benign            | 0     | 1    | 0    |
| CUB and sushi domain-containing protein 2 | CSMD2   | L3294F | Possibly damaging | 0.533 | 0.88 | 0.9  |
| Argininosuccinate synthase                | ASS1    | E256K  | Benign            | 0.004 | 0.97 | 0.59 |
| Protein FAM110D                           | FAM110  | P153S  | Possibly damaging | 0.476 | 0.89 | 0.9  |
| Dipeptidyl peptidase 1                    | CTSC    | I153T  | Benign            | 0     | 1    | 0    |
| Septin-7                                  | SEPTIN7 | R147L  | Probably damaging | 0.995 | 0.68 | 0.97 |
| Myeloid cell surface antigen CD33         | CD33    | R69G   | Benign            | 0.016 | 0.95 | 0.79 |
| CMRF35-like molecule 9                    | CD300LG | R60P   | Benign            | 0.14  | 0.92 | 0.86 |
| Plectin                                   | PLEC    | A641V  | Benign            | 0     | 1    | 0    |
| Basal cell adhesion molecule              | BCAM    | G85D   | Probably damaging | 0.998 | 0.27 | 0.99 |
| Acetyl-CoA carboxylase 2                  | ACACB   | R1298Q | Probably damaging | 1     | 0    | 1    |
| Tropomyosin alpha-3 chain                 | TPM3    | R245G  |                   |       |      |      |
| Nuclear mitotic apparatus protein 1       | NUMA1   | E1479Q | Benign            | 0.4   | 0.9  | 0.9  |
| Collagen alpha-1(V) chain                 | COL5A1  | E947K  | Possibly damaging | 0.956 | 0.79 | 0.95 |
| C-type lectin domain family 14 member A   | CLEC14A | D337G  | Benign            | 0     | 1    | 0    |

**Table S7.** Prediction of likely impact of point mutations on protein-protein interactions using SAAMBE-SEQ tool.

| Protein (Gene name) 1 | Protein (Gene name) 2  | Prediction                        |
|-----------------------|------------------------|-----------------------------------|
| Protein AMBP (AMBP)   | Lactotransferrin (LTF) | Position Wild Mutant ddG Type     |
|                       |                        | 69 V M 0.47 Destabilizing         |
|                       |                        | 192 E G 0.72 Destabilizing        |
|                       |                        | <b>286 A G 0.56 Destabilizing</b> |
|                       |                        | 238 G S 0.58 Destabilizing        |
|                       |                        | 197 P S 0.86 Destabilizing        |
|                       |                        | 338 G S 0.65 Destabilizing        |
|                       |                        | 341 G A 0.70 Destabilizing        |
|                       |                        | 313 V I 1.29 Destabilizing        |
|                       |                        | 186 G R -0.36 Stabilizing         |
| Protein AMBP (AMBP)   | Complement C3 (C3)     | 185 R Q 1.31 Destabilizing        |
|                       |                        | Position Wild Mutant ddG Type     |
|                       |                        | 69 V M 0.23 Destabilizing         |
|                       |                        | 192 E G 0.56 Destabilizing        |
|                       |                        | <b>286 A G 0.44 Destabilizing</b> |

|                     |                                             |                                                                                                                                                                                                                                                                                                                                                |
|---------------------|---------------------------------------------|------------------------------------------------------------------------------------------------------------------------------------------------------------------------------------------------------------------------------------------------------------------------------------------------------------------------------------------------|
|                     |                                             | 238 G S 0.36 Destabilizing<br>197 P S 0.78 Destabilizing<br>338 G S 0.68 Destabilizing<br>341 G A 0.69 Destabilizing<br>313 V I 1.18 Destabilizing<br>186 G R -0.27 Stabilizing<br>185 R Q 1.19 Destabilizing                                                                                                                                  |
| Protein AMBP (AMBP) | Myeloid cell surface antigen<br>CD33 (CD33) | Position Wild Mutant ddG Type<br>69 V M 0.31 Destabilizing<br>192 E G 0.68 Destabilizing<br><b>286 A G 0.64 Destabilizing</b><br>238 G S 0.30 Destabilizing<br>197 P S 0.79 Destabilizing<br>338 G S 0.55 Destabilizing<br>341 G A 0.79 Destabilizing<br>313 V I 0.88 Destabilizing<br>186 G R -0.17 Stabilizing<br>185 R Q 1.09 Destabilizing |
| Protein AMBP (AMBP) | Kininogen-1 (KNG1)                          | Position Wild Mutant ddG Type<br>69 V M 0.30 Destabilizing<br>192 E G 0.67 Destabilizing<br><b>286 A G 0.37 Destabilizing</b><br>238 G S 0.48 Destabilizing<br>197 P S 0.84 Destabilizing<br>338 G S 0.56 Destabilizing<br>341 G A 0.68 Destabilizing<br>313 V I 0.96 Destabilizing<br>186 G R -0.24 Stabilizing<br>185 R Q 1.31 Destabilizing |
| Protein AMBP (AMBP) | Alpha-1-antichymotrypsin<br>(SERPINA3)      | Position Wild Mutant ddG Type<br>69 V M 0.43 Destabilizing<br>192 E G 0.68 Destabilizing<br><b>286 A G 0.58 Destabilizing</b><br>238 G S 0.29 Destabilizing<br>197 P S 0.77 Destabilizing<br>338 G S 0.96 Destabilizing<br>341 G A 0.91 Destabilizing<br>313 V I 0.94 Destabilizing<br>186 G R -0.03 Stabilizing<br>185 R Q 1.01 Destabilizing |
| Protein AMBP (AMBP) | Haptoglobin-related protein<br>(HPR)        | Position Wild Mutant ddG Type<br>69 V M 0.49 Destabilizing<br>192 E G 0.94 Destabilizing<br><b>286 A G 0.80 Destabilizing</b><br>238 G S 0.47 Destabilizing<br>197 P S 0.73 Destabilizing<br>338 G S 0.92 Destabilizing<br>341 G A 0.99 Destabilizing<br>313 V I 0.89 Destabilizing<br>186 G R -0.24 Stabilizing<br>185 R Q 1.27 Destabilizing |

|                     |                                                 |                                          |
|---------------------|-------------------------------------------------|------------------------------------------|
| Protein AMBP (AMBP) | Osteopontin (SPP1)                              | Position Wild Mutant ddG Type            |
|                     |                                                 | 69 V M 0.18 Destabilizing                |
|                     |                                                 | 192 E G 0.77 Destabilizing               |
|                     |                                                 | <b><u>286 A G 0.33 Destabilizing</u></b> |
|                     |                                                 | 238 G S 0.37 Destabilizing               |
|                     |                                                 | 197 P S 0.75 Destabilizing               |
|                     |                                                 | 338 G S 0.39 Destabilizing               |
|                     |                                                 | 341 G A 0.56 Destabilizing               |
|                     |                                                 | 313 V I 0.89 Destabilizing               |
|                     |                                                 | 186 G R -0.22 Stabilizing                |
| Protein AMBP (AMBP) | Complement C1r subcomponent-like protein (C1RL) | Position Wild Mutant ddG Type            |
|                     |                                                 | 69 V M 0.39 Destabilizing                |
|                     |                                                 | 192 E G 0.86 Destabilizing               |
|                     |                                                 | <b><u>286 A G 0.85 Destabilizing</u></b> |
|                     |                                                 | 238 G S 0.45 Destabilizing               |
|                     |                                                 | 197 P S 0.81 Destabilizing               |
|                     |                                                 | 338 G S 0.80 Destabilizing               |
|                     |                                                 | 341 G A 0.93 Destabilizing               |
|                     |                                                 | 313 V I 1.01 Destabilizing               |
|                     |                                                 | 186 G R -0.24 Stabilizing                |
| Protein AMBP (AMBP) | Fibronectin (FN1)                               | Position Wild Mutant ddG Type            |
|                     |                                                 | 69 V M 0.32 Destabilizing                |
|                     |                                                 | 192 E G 0.80 Destabilizing               |
|                     |                                                 | <b><u>286 A G 0.54 Destabilizing</u></b> |
|                     |                                                 | 238 G S 0.59 Destabilizing               |
|                     |                                                 | 197 P S 0.72 Destabilizing               |
|                     |                                                 | 338 G S 0.93 Destabilizing               |
|                     |                                                 | 341 G A 0.94 Destabilizing               |
|                     |                                                 | 313 V I 1.13 Destabilizing               |
|                     |                                                 | 186 G R -0.23 Stabilizing                |
| Protein AMBP (AMBP) | Zinc-alpha-2-glycoprotein (AZGP1)               | Position Wild Mutant ddG Type            |
|                     |                                                 | 69 V M 0.46 Destabilizing                |
|                     |                                                 | 192 E G 0.87 Destabilizing               |
|                     |                                                 | <b><u>286 A G 0.56 Destabilizing</u></b> |
|                     |                                                 | 238 G S 0.29 Destabilizing               |
|                     |                                                 | 197 P S 0.68 Destabilizing               |
|                     |                                                 | 338 G S 0.91 Destabilizing               |
|                     |                                                 | 341 G A 0.96 Destabilizing               |
|                     |                                                 | 313 V I 0.75 Destabilizing               |
|                     |                                                 | 186 G R 0.17 Destabilizing               |
| Protein AMBP (AMBP) | Retinol-binding protein 4 (RBP4)                | Position Wild Mutant ddG Type            |
|                     |                                                 | 69 V M 0.47 Destabilizing                |
|                     |                                                 | 192 E G 0.90 Destabilizing               |
|                     |                                                 | <b><u>286 A G 0.82 Destabilizing</u></b> |
|                     |                                                 | 238 G S 0.59 Destabilizing               |
|                     |                                                 | 197 P S 1.00 Destabilizing               |
|                     |                                                 | 338 G S 0.83 Destabilizing               |
|                     |                                                 | 341 G A 0.96 Destabilizing               |

|                     |                 |                                                                                                                                                                                                                                                                                                                                                        |
|---------------------|-----------------|--------------------------------------------------------------------------------------------------------------------------------------------------------------------------------------------------------------------------------------------------------------------------------------------------------------------------------------------------------|
|                     |                 | 313 V I 1.33 Destabilizing<br>186 G R -0.08 Stabilizing<br>185 R Q 1.42 Destabilizing                                                                                                                                                                                                                                                                  |
| Protein AMBP (AMBP) | Hemopexin (HPX) | Position Wild Mutant ddG Type<br>69 V M 0.19 Destabilizing<br>192 E G 0.90 Destabilizing<br><b><u>286 A G 0.64 Destabilizing</u></b><br>238 G S 0.33 Destabilizing<br>197 P S 0.74 Destabilizing<br>338 G S 0.49 Destabilizing<br>341 G A 0.89 Destabilizing<br>313 V I 0.79 Destabilizing<br>186 G R -0.34 Stabilizing<br>185 R Q 1.31 Destabilizing  |
|                     |                 | Position Wild Mutant ddG Type<br>69 V M 0.53 Destabilizing<br>192 E G 0.73 Destabilizing<br><b><u>286 A G 0.66 Destabilizing</u></b><br>238 G S 0.30 Destabilizing<br>197 P S 0.71 Destabilizing<br>338 G S 0.90 Destabilizing<br>341 G A 0.87 Destabilizing<br>313 V I 0.87 Destabilizing<br>186 G R -0.00 Stabilizing<br>185 R Q 1.06 Destabilizing  |
|                     |                 | Position Wild Mutant ddG Type<br>69 V M 0.58 Destabilizing<br>192 E G 0.69 Destabilizing<br><b><u>286 A G 0.62 Destabilizing</u></b><br>238 G S 0.35 Destabilizing<br>197 P S 0.73 Destabilizing<br>338 G S 0.96 Destabilizing<br>341 G A 0.81 Destabilizing<br>313 V I 0.84 Destabilizing<br>186 G R 0.00 Destabilizing<br>185 R Q 1.02 Destabilizing |
|                     |                 | Position Wild Mutant ddG Type<br>69 V M 0.27 Destabilizing<br>192 E G 0.55 Destabilizing<br><b><u>286 A G 0.28 Destabilizing</u></b><br>238 G S 0.50 Destabilizing<br>197 P S 0.90 Destabilizing<br>338 G S 0.60 Destabilizing<br>341 G A 0.63 Destabilizing<br>313 V I 1.25 Destabilizing<br>186 G R -0.38 Stabilizing<br>185 R Q 1.12 Destabilizing  |
|                     |                 | Position Wild Mutant ddG Type<br>69 V M 0.26 Destabilizing<br>192 E G 0.52 Destabilizing<br><b><u>286 A G 0.60 Destabilizing</u></b><br>238 G S 0.44 Destabilizing                                                                                                                                                                                     |



|                                                                              |                                                     |                                                                                                                                                                                                                                                                                                                                                |
|------------------------------------------------------------------------------|-----------------------------------------------------|------------------------------------------------------------------------------------------------------------------------------------------------------------------------------------------------------------------------------------------------------------------------------------------------------------------------------------------------|
|                                                                              |                                                     | 197 P S 0.76 Destabilizing<br>338 G S 0.82 Destabilizing<br>341 G A 0.81 Destabilizing<br>313 V I 1.14 Destabilizing<br>186 G R -0.23 Stabilizing<br>185 R Q 0.99 Destabilizing                                                                                                                                                                |
| Protein AMBP (AMBP)                                                          | Inter-alpha-trypsin inhibitor heavy chain H4 (ITI4) | Position Wild Mutant ddG Type<br>69 V M 0.57 Destabilizing<br>192 E G 0.96 Destabilizing<br><b>286 A G 0.70 Destabilizing</b><br>238 G S 0.63 Destabilizing<br>197 P S 1.11 Destabilizing<br>338 G S 0.91 Destabilizing<br>341 G A 0.95 Destabilizing<br>313 V I 1.53 Destabilizing<br>186 G R -0.02 Stabilizing<br>185 R Q 1.51 Destabilizing |
| Protein AMBP (AMBP)                                                          | Fibrinogen alpha chain (FGA)                        | Position Wild Mutant ddG Type<br>69 V M 0.40 Destabilizing<br>192 E G 0.81 Destabilizing<br><b>286 A G 0.75 Destabilizing</b><br>238 G S 0.36 Destabilizing<br>197 P S 0.90 Destabilizing<br>338 G S 0.72 Destabilizing<br>341 G A 0.92 Destabilizing<br>313 V I 1.19 Destabilizing<br>186 G R -0.04 Stabilizing<br>185 R Q 1.29 Destabilizing |
| Protein AMBP (AMBP)                                                          | Prothrombin (F2)                                    | Position Wild Mutant ddG Type<br>69 V M 0.15 Destabilizing<br>192 E G 0.79 Destabilizing<br><b>286 A G 0.61 Destabilizing</b><br>238 G S 0.26 Destabilizing<br>197 P S 0.80 Destabilizing<br>338 G S 0.69 Destabilizing<br>341 G A 0.88 Destabilizing<br>313 V I 1.00 Destabilizing<br>186 G R -0.21 Stabilizing<br>185 R Q 1.23 Destabilizing |
| Basement membrane-specific heparan sulfate proteoglycan core protein (HSPG2) | Collagen alpha-3(IV) chain (COL4A3)                 | Position Wild Mutant ddG Type<br><b>1062 Q H 0.70 Destabilizing</b><br>4332 V I 1.08 Destabilizing<br>1503 A V 0.24 Destabilizing<br>970 S F 0.48 Destabilizing<br>638 M V 0.74 Destabilizing                                                                                                                                                  |
| Basement membrane-specific heparan sulfate proteoglycan core protein (HSPG2) | Collagen alpha-1(V) chain (COL5A1)                  | Position Wild Mutant ddG Type<br><b>1062 Q H 0.66 Destabilizing</b><br>4332 V I 1.18 Destabilizing<br>1503 A V 0.25 Destabilizing<br>970 S F 0.63 Destabilizing<br>638 M V 0.80 Destabilizing                                                                                                                                                  |

|                                                                              |                                                       |                                                                                                                                                                                                      |
|------------------------------------------------------------------------------|-------------------------------------------------------|------------------------------------------------------------------------------------------------------------------------------------------------------------------------------------------------------|
| Basement membrane-specific heparan sulfate proteoglycan core protein (HSPG2) | Collagen alpha-1(VI) chain (COL6A1)                   | Position Wild Mutant ddG Type<br><b><u>1062 Q H 0.39 Destabilizing</u></b><br>4332 V I 1.23 Destabilizing<br>1503 A V -0.42 Stabilizing<br>970 S F 0.56 Destabilizing<br>638 M V 0.74 Destabilizing  |
| Basement membrane-specific heparan sulfate proteoglycan core protein (HSPG2) | Fibronectin (FN1)                                     | Position Wild Mutant ddG Type<br><b><u>1062 Q H 1.18 Destabilizing</u></b><br>4332 V I 1.32 Destabilizing<br>1503 A V 0.15 Destabilizing<br>970 S F 0.70 Destabilizing<br>638 M V 1.01 Destabilizing |
| Basement membrane-specific heparan sulfate proteoglycan core protein (HSPG2) | Nidogen-1 (NID1)                                      | Position Wild Mutant ddG Type<br><b><u>1062 Q H 1.12 Destabilizing</u></b><br>4332 V I 1.10 Destabilizing<br>1503 A V -0.14 Stabilizing<br>970 S F 0.52 Destabilizing<br>638 M V 0.94 Destabilizing  |
| Basement membrane-specific heparan sulfate proteoglycan core protein (HSPG2) | Inter-alpha-trypsin inhibitor heavy chain H4 (ITIH4)  | Position Wild Mutant ddG Type<br><b><u>1062 Q H 0.88 Destabilizing</u></b><br>4332 V I 1.48 Destabilizing<br>1503 A V 0.06 Destabilizing<br>970 S F 0.53 Destabilizing<br>638 M V 1.03 Destabilizing |
| Complement decay-accelerating factor (CD55)                                  | Complement C3 (C3)                                    | Position Wild Mutant ddG Type<br><b><u>162 S L 0.74 Destabilizing</u></b>                                                                                                                            |
| Vasorin (VASN)                                                               | Fibronectin (FN1)                                     | Position Wild Mutant ddG Type<br><b><u>161 R Q 1.56 Destabilizing</u></b>                                                                                                                            |
| Fibronectin (FN1)                                                            | Insulin-like growth factor-binding protein 7 (IGFBP7) | Position Wild Mutant ddG Type<br>2261 V I 1.78 Destabilizing                                                                                                                                         |
| Alpha-2-HS-glycoprotein (AHSG)                                               | Osteopontin (SPP1)                                    | Position Wild Mutant ddG Type<br>75 G A 0.83 Destabilizing                                                                                                                                           |
| Fibronectin (FN1)                                                            | Prostate-specific antigen (KLK3)                      | Position Wild Mutant ddG Type<br>2261 V I 1.83 Destabilizing                                                                                                                                         |
| Fibronectin (FN1)                                                            | Alpha-1-antitrypsin (SERPINA1)                        | Position Wild Mutant ddG Type<br>2261 V I 1.01 Destabilizing                                                                                                                                         |
| Fibronectin (FN1)                                                            | Osteopontin (SPP1)                                    | Position Wild Mutant ddG Type<br>2261 V I 1.36 Destabilizing                                                                                                                                         |
| Alpha-2-HS-glycoprotein (AHSG)                                               | Fibronectin (FN1)                                     | Position Wild Mutant ddG Type<br>75 G A 1.36 Destabilizing                                                                                                                                           |
| Complement C3 (C3)                                                           | Fibronectin (FN1)                                     | Position Wild Mutant ddG Type<br>314 P L 0.38 Destabilizing                                                                                                                                          |
| Prothrombin (F2)                                                             | Fibronectin (FN1)                                     | Position Wild Mutant ddG Type<br>110 E K 1.11 Destabilizing                                                                                                                                          |
| Fibrinogen alpha chain (FGA)                                                 | Fibronectin (FN1)                                     | Position Wild Mutant ddG Type<br>633 D E 0.93 Destabilizing                                                                                                                                          |
| Fibrinogen alpha chain (FGA)                                                 | Alpha-1-antitrypsin (SERPINA1)                        | Position Wild Mutant ddG Type<br>633 D E 0.12 Destabilizing                                                                                                                                          |
| Alpha-2-HS-glycoprotein (AHSG)                                               | Fibrinogen alpha chain (FGA)                          | Position Wild Mutant ddG Type<br>75 G A 1.03 Destabilizing                                                                                                                                           |
| Complement C3 (C3)                                                           | Fibrinogen alpha chain (FGA)                          | Position Wild Mutant ddG Type<br>314 P L 0.42 Destabilizing                                                                                                                                          |

|                                  |                                |                                                                                                                                                                                                                                                                             |
|----------------------------------|--------------------------------|-----------------------------------------------------------------------------------------------------------------------------------------------------------------------------------------------------------------------------------------------------------------------------|
| Prothrombin (F2)                 | Fibrinogen alpha chain (FGA)   | Position Wild Mutant ddG Type<br>110 E K 0.93 Destabilizing                                                                                                                                                                                                                 |
| Prothrombin (F2)                 | Osteopontin (SPP1)             | Position Wild Mutant ddG Type<br>110 E K 0.83 Destabilizing                                                                                                                                                                                                                 |
| Alpha-2-HS-glycoprotein (AHSG)   | Prothrombin (F2)               | Position Wild Mutant ddG Type<br>75 G A 1.06 Destabilizing                                                                                                                                                                                                                  |
| Complement C3 (C3)               | Prothrombin (F2)               | Position Wild Mutant ddG Type<br>314 P L 0.34 Destabilizing                                                                                                                                                                                                                 |
| Alpha-2-HS-glycoprotein (AHSG)   | Complement C3 (C3)             | Position Wild Mutant ddG Type<br>75 G A 0.84 Destabilizing                                                                                                                                                                                                                  |
| Alpha-2-HS-glycoprotein (AHSG)   | Alpha-1-antitrypsin (SERPINA1) | Position Wild Mutant ddG Type<br>75 G A 1.01 Destabilizing                                                                                                                                                                                                                  |
| Complement C3 (C3)               | Alpha-1-antitrypsin (SERPINA1) | Position Wild Mutant ddG Type<br>314 P L 0.25 Destabilizing                                                                                                                                                                                                                 |
| Prothrombin (F2)                 | Alpha-1-antitrypsin (SERPINA1) | Position Wild Mutant ddG Type<br>110 E K 0.76 Destabilizing                                                                                                                                                                                                                 |
| Prostate-specific antigen (KLK3) | Alpha-1-antitrypsin (SERPINA1) | Position Wild Mutant ddG Type<br>209 C Y 0.14 Destabilizing<br>156 G V 1.17 Destabilizing<br>55 V M 0.51 Destabilizing<br>117 S P 0.11 Destabilizing<br>87 G R 1.26 Destabilizing<br>124 L F 1.07 Destabilizing<br>154 A T 0.67 Destabilizing<br>179 I T 1.59 Destabilizing |
| Kininogen-1 (KNG1)               | Alpha-1-antitrypsin (SERPINA1) | Position Wild Mutant ddG Type<br>154 P L 0.57 Destabilizing                                                                                                                                                                                                                 |
| Alpha-2-HS-glycoprotein (AHSG)   | Kininogen-1 (KNG1)             | Position Wild Mutant ddG Type<br>75 G A 0.83 Destabilizing                                                                                                                                                                                                                  |
| Complement C3 (C3)               | Kininogen-1 (KNG1)             | Position Wild Mutant ddG Type<br>314 P L 0.38 Destabilizing                                                                                                                                                                                                                 |
| Prothrombin (F2)                 | Kininogen-1 (KNG1)             | Position Wild Mutant ddG Type<br>110 E K 0.77 Destabilizing                                                                                                                                                                                                                 |
| Fibrinogen alpha chain (FGA)     | Kininogen-1 (KNG1)             | Position Wild Mutant ddG Type<br>633 D E 0.44 Destabilizing                                                                                                                                                                                                                 |
| Fibronectin (FN1)                | Kininogen-1 (KNG1)             | Position Wild Mutant ddG Type<br>2261 V I 1.45 Destabilizing                                                                                                                                                                                                                |
| Prostate-specific antigen (KLK3) | Kininogen-1 (KNG1)             | Position Wild Mutant ddG Type<br>209 C Y 0.52 Destabilizing<br>156 G V 0.90 Destabilizing<br>55 V M 0.66 Destabilizing<br>117 S P 0.16 Destabilizing<br>87 G R 1.06 Destabilizing<br>124 L F 0.79 Destabilizing<br>154 A T 0.48 Destabilizing<br>179 I T 1.48 Destabilizing |

### Protein AMBP (AMBP)

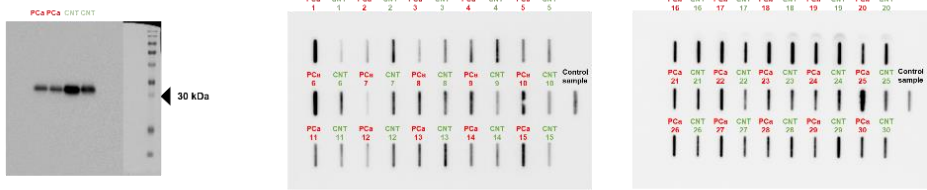

### Vesicular integral-membrane protein VIP36 (LMAN2)

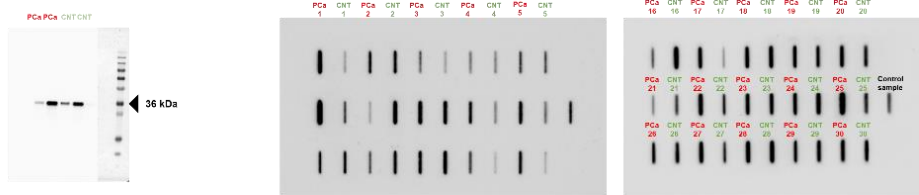

### EGF-containing fibulin-like extracellular matrix protein 1 (EFEMP1)

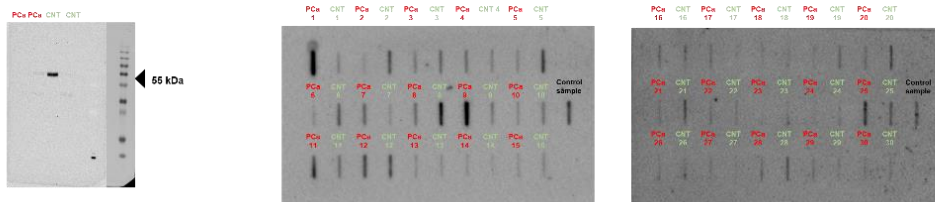

### Cadherin-1 (CDH1)

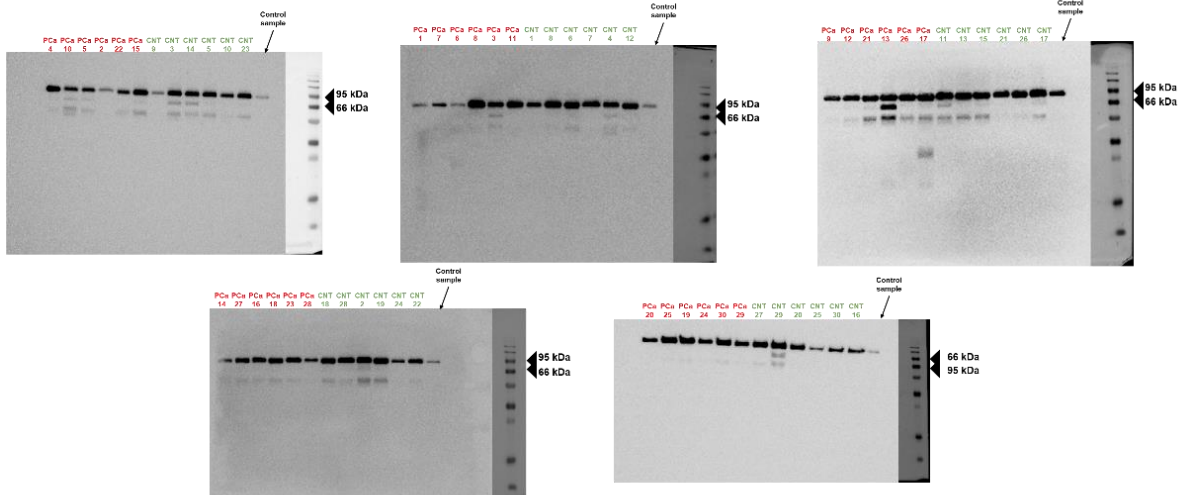

### Transthyretin (TTR)

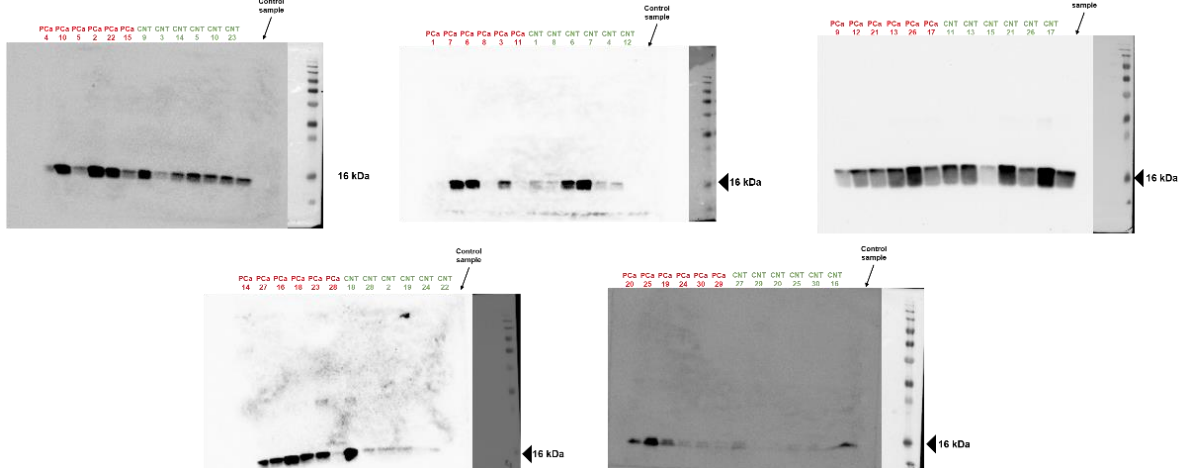

**Figure S1.** Original western blots figures.

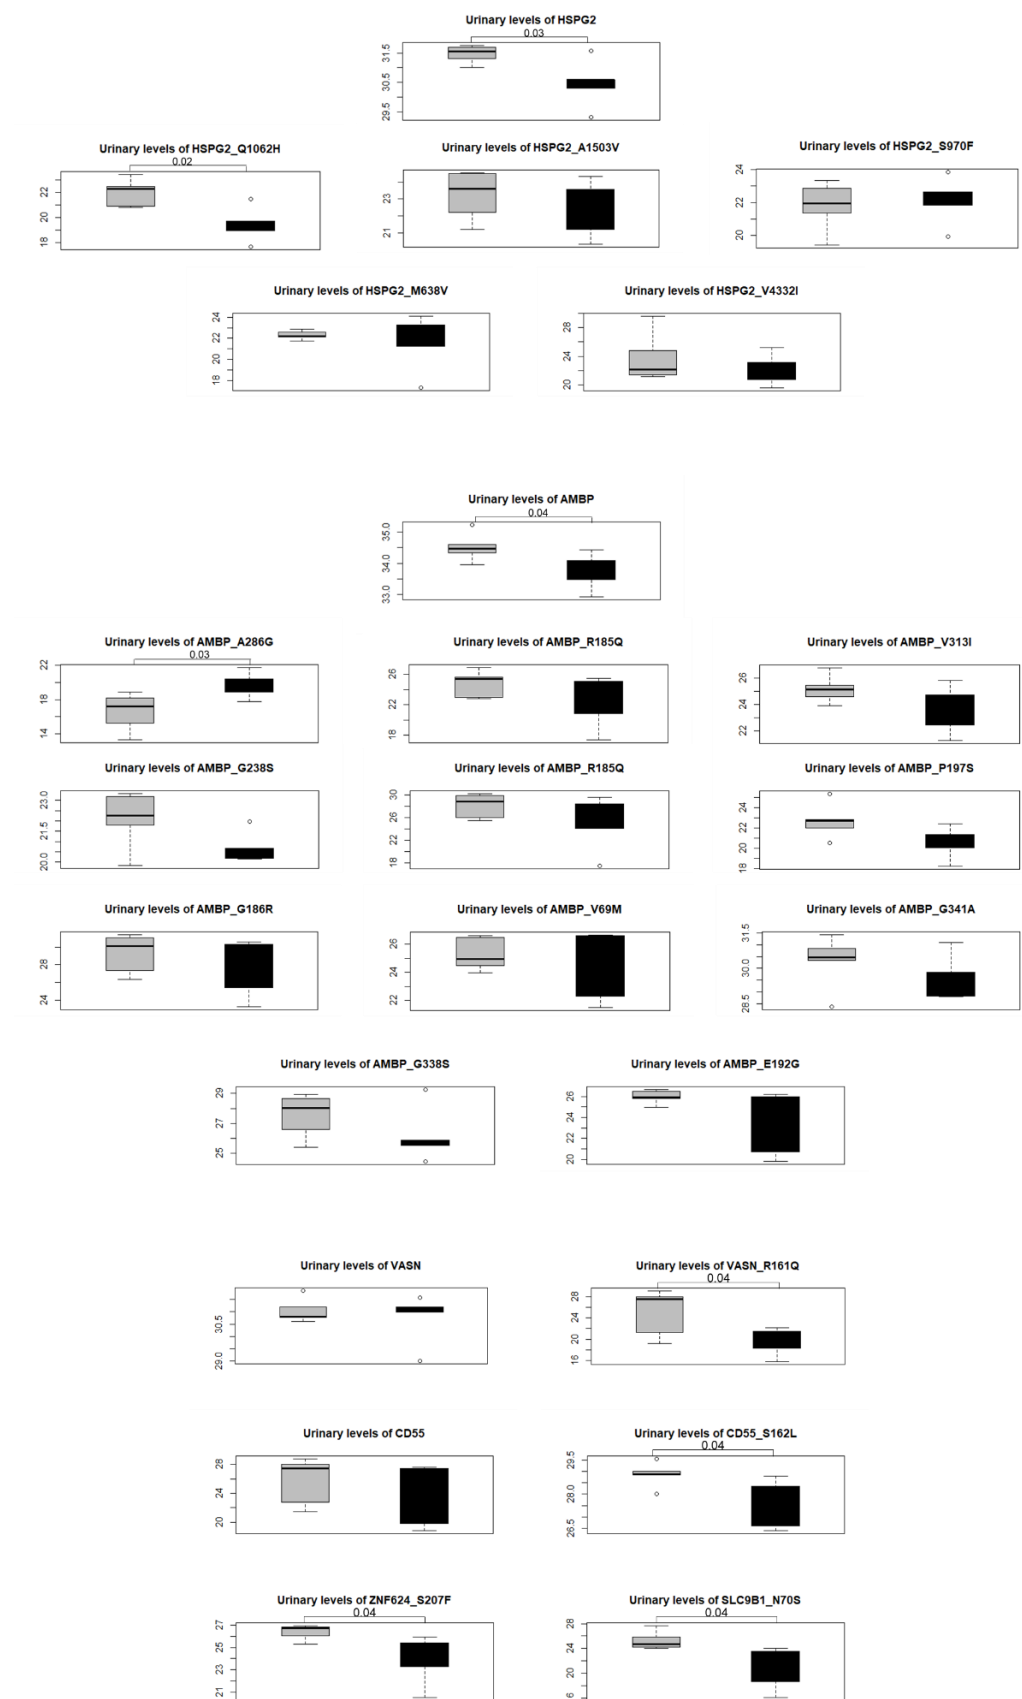

**Figure S2.** Levels of AMBP\*A286G, SLC9B1\*N70S, HSPG2\*Q1062H, ZNF624\*S207F, VASN\*R161Q, and CD55\*S162L mutant protein isoforms and respective levels of native form (when applicable) in the urine from PCA patients.
